# Supplementary material
Source: PubMed Central journal article supplement (PMC3501756)
Supplement: NIHMS404919-supplement-supplement_1.pdf [file NIHMS404919-supplement-supplement_1.pdf]

**Table S1. Among patients taking antihypertensives prior to pregnancy, patterns of antihypertensive dispensing during the first trimester. The Medicaid Analytic Extract Pregnancy Cohort.**

| <b>Antihypertensive type</b>            | <b>Continue same antihypertensive</b> | <b>No antihypertensive</b> | <b>Change to methyldopa</b> | <b>Change to labetalol</b> | <b>Change to other antihypertensive</b> |
|-----------------------------------------|---------------------------------------|----------------------------|-----------------------------|----------------------------|-----------------------------------------|
| <b>Diuretics</b>                        |                                       |                            |                             |                            |                                         |
| Thiazides                               | 1295 (30.59)                          | 2104 (49.69)               | 422 (9.97)                  | 112 (2.65)                 | 301 (7.11)                              |
| Potassium-Sparing Agents                | 100 (24.75)                           | 259 (64.11)                | 12 (2.97)                   | *                          | 30 (7.43)                               |
| Acetazolamide                           | 44 (26.04)                            | 111 (65.68)                | *                           | *                          | *                                       |
| <b>Adrenergic Inhibitors</b>            |                                       |                            |                             |                            |                                         |
| Central Alpha-Antagonists               | 769 (38.6)                            | 1052 (52.81)               | *                           | 46 (2.31)                  | 125 (6.28)                              |
| Alpha Blockers                          | 29 (32.58)                            | 50 (56.18)                 | *                           | *                          | *                                       |
| Beta Blockers                           | 2454 (33.37)                          | 4207 (57.21)               | 347 (4.72)                  | 105 (1.43)                 | 241 (3.28)                              |
| Combined Alpha And Beta Blockers        | 317 (33.69)                           | 493 (52.39)                | 47 (4.99)                   | *                          | 84 (8.93)                               |
| <b>Direct Vasodilators</b>              | 18 (18.37)                            | 50 (51.02)                 | *                           | *                          | 18 (18.37)                              |
| <b>Calcium Channel Antagonists</b>      |                                       |                            |                             |                            |                                         |
| Nondihydropyridines                     | 416 (31.47)                           | 708 (53.56)                | 88 (6.66)                   | 18 (1.36)                  | 92 (6.96)                               |
| Dihydropyridines                        | 1019 (31.92)                          | 1588 (49.75)               | 324 (10.15)                 | 85 (2.66)                  | 176 (5.51)                              |
| <b>ACE Inhibitors</b>                   | 1483 (37.27)                          | 1619 (40.69)               | 451 (11.33)                 | 123 (3.09)                 | 303 (7.61)                              |
| <b>Angiotensin II Receptor Blockers</b> | 279 (34.96)                           | 302 (37.84)                | 114 (14.29)                 | 27 (3.38)                  | 76 (9.52)                               |
| <b>Combination Drugs</b>                |                                       |                            |                             |                            |                                         |

|                                                         |             |             |             |           |           |
|---------------------------------------------------------|-------------|-------------|-------------|-----------|-----------|
| Beta Blockers And<br>Diuretics                          | 139 (44.55) | 107 (34.29) | 31 (9.94)   | 12 (3.85) | 23 (7.37) |
| ACE Inhibitors And<br>Diuretics                         | 196 (38.28) | 167 (32.62) | 99 (19.34)  | 17 (3.32) | 33 (6.45) |
| Angiotensin II<br>Receptor Antagonists<br>And Diuretics | 259 (40.03) | 192 (29.68) | 122 (18.86) | 16 (2.47) | 58 (8.96) |
| Calcium Antagonists<br>And ACE Inhibitors               | 180 (38.96) | 134 (29)    | 90 (19.48)  | 17 (3.68) | 41 (8.87) |
| Other Combinations                                      | 515 (29.29) | 950 (54.04) | 164 (9.33)  | 42 (2.39) | 87 (4.95) |

---

\*Cannot be displayed due to restrictions regarding the publication of small cells in the data use agreement.

**Table S2. Among patients taking antihypertensives prior to pregnancy, patterns of antihypertensive dispensing during the second trimester. The Medicaid Analytic Extract Pregnancy Cohort.**

| <b>Antihypertensive type</b>            | <b>Continue same antihypertensive</b> | <b>No antihypertensive</b> | <b>Change to methyldopa</b> | <b>Change to labetalol</b> | <b>Change to other antihypertensive</b> |
|-----------------------------------------|---------------------------------------|----------------------------|-----------------------------|----------------------------|-----------------------------------------|
| <b>Diuretics</b>                        |                                       |                            |                             |                            |                                         |
| Thiazides                               | 313 (7.39)                            | 2788 (65.85)               | 686 (16.2)                  | 197 (4.65)                 | 250 (5.9)                               |
| Potassium-Sparing Agents                | 16 (3.96)                             | 339 (83.91)                | 15 (3.71)                   | *                          | 28 (6.93)                               |
| Acetazolamide                           | 24 (14.2)                             | 133 (78.7)                 | *                           | *                          | *                                       |
| <b>Adrenergic Inhibitors</b>            |                                       |                            |                             |                            |                                         |
| Central Alpha-Antagonists               | 582 (29.22)                           | 1264 (63.45)               | *                           | 72 (3.61)                  | 74 (3.71)                               |
| Alpha Blockers                          | *                                     | 60 (67.42)                 | 12 (13.48)                  | *                          | *                                       |
| Beta Blockers                           | 1224 (16.64)                          | 5203 (70.75)               | 550 (7.48)                  | 212 (2.88)                 | 165 (2.24)                              |
| Combined Alpha And Beta Blockers        | 276 (29.33)                           | 536 (56.96)                | 80 (8.5)                    | *                          | 49 (5.21)                               |
| <b>Direct Vasodilators</b>              | 14 (14.29)                            | 59 (60.2)                  | *                           | *                          | *                                       |
| <b>Calcium Channel Antagonists</b>      |                                       |                            |                             |                            |                                         |
| Nondihydropyridines                     | 170 (12.86)                           | 885 (66.94)                | 160 (12.1)                  | 41 (3.1)                   | 66 (4.99)                               |
| Dihydropyridines                        | 542 (16.98)                           | 1907 (59.74)               | 500 (15.66)                 | 147 (4.61)                 | 96 (3.01)                               |
| <b>ACE Inhibitors</b>                   | 265 (6.66)                            | 2444 (61.42)               | 751 (18.87)                 | 214 (5.38)                 | 305 (7.67)                              |
| <b>Angiotensin II Receptor Blockers</b> | 62 (7.77)                             | 457 (57.27)                | 163 (20.43)                 | 47 (5.89)                  | 69 (8.65)                               |
| <b>Combination Drugs</b>                |                                       |                            |                             |                            |                                         |

|                                                   |            |             |             |           |           |
|---------------------------------------------------|------------|-------------|-------------|-----------|-----------|
| Beta Blockers And Diuretics                       | 34 (10.9)  | 167 (53.53) | 63 (20.19)  | 17 (5.45) | 31 (9.94) |
| ACE Inhibitors And Diuretics                      | 25 (4.88)  | 256 (50)    | 153 (29.88) | 40 (7.81) | 38 (7.42) |
| Angiotensin II Receptor Antagonists And Diuretics | 42 (6.49)  | 319 (49.3)  | 193 (29.83) | 40 (6.18) | 53 (8.19) |
| Calcium Antagonists And ACE Inhibitors            | 39 (8.44)  | 211 (45.67) | 136 (29.44) | 39 (8.44) | 37 (8.01) |
| Other Combinations                                | 120 (6.83) | 1206 (68.6) | 270 (15.36) | 65 (3.7)  | 97 (5.52) |

---

\*Cannot be displayed due to restrictions regarding the publication of small cells in the data use agreement.
